# Supplementary material
Source: HighWire-hosted journal article supplement (https://bmjopen.bmj.com/content/12/7/e053981)
Supplement: inline-supplementary-material-2 [file inline-supplementary-material-2.pdf]

**Supplementary File 2.** Socio-demographic, lifestyle and anthropometric characteristic of the six identified latent classes, Longitudinal Ageing Study in India (LASI), wave-1, 2017-18.

| Predictors                | Latent Class       |              |                                                                   |                                               |                     |                                   |
|---------------------------|--------------------|--------------|-------------------------------------------------------------------|-----------------------------------------------|---------------------|-----------------------------------|
|                           | 1                  | 2            | 3                                                                 | 4                                             | 5                   | 6                                 |
|                           | Relatively Healthy | Hypertension | Gastrointestinal Disorders-Hypertension-Musculoskeletal Disorders | Musculoskeletal disorders-Hypertension-Asthma | Metabolic disorders | Complex cardiometabolic disorders |
| <b>Age (in years)</b>     |                    |              |                                                                   |                                               |                     |                                   |
| 45-49                     | 9029 (75.76)       | 1893 (15.88) | 654 (5.49)                                                        | 53 (0.44)                                     | 211 (1.77)          | 77 (0.64)                         |
| 50-54                     | 6899 (69.95)       | 1995 (20.23) | 574 (5.82)                                                        | 50 (0.51)                                     | 251 (2.54)          | 94 (0.95)                         |
| 55-59                     | 5972 (65.94)       | 2093 (23.11) | 558 (6.16)                                                        | 60 (0.66)                                     | 255 (2.82)          | 119 (1.31)                        |
| 60-64                     | 5763 (62.68)       | 2305 (25.07) | 623 (6.78)                                                        | 72 (0.78)                                     | 298 (3.24)          | 134 (1.45)                        |
| 65-69                     | 4619 (57.88)       | 2324 (9.12)  | 566 (7.09)                                                        | 79 (0.99)                                     | 239 (2.99)          | 154 (2.49)                        |
| 70-74                     | 2854 (55.68)       | 1551 (30.26) | 388 (7.57)                                                        | 54 (1.05)                                     | 151 (2.94)          | 128 (2.49)                        |
| 75-79                     | 1633 (54.62)       | 910 (30.43)  | 247 (8.26)                                                        | 42 (1.40)                                     | 82 (2.74)           | 76 (2.54)                         |
| 80+                       | 1573 (55.27)       | 844 (29.66)  | 267 (9.38)                                                        | 49 (1.72)                                     | 40 (1.41)           | 73 (2.57)                         |
| <b>Sex</b>                |                    |              |                                                                   |                                               |                     |                                   |
| Male                      | 18897 (69.03)      | 5627 (20.56) | 1627 (5.94)                                                       | 233 (0.85)                                    | 637 (2.32)          | 353 (1.29)                        |
| Female                    | 19445 (61.53)      | 8288 (26.23) | 2250 (7.12)                                                       | 226 (0.72)                                    | 890 (2.82)          | 502 (1.59)                        |
| <b>Place of Residence</b> |                    |              |                                                                   |                                               |                     |                                   |
| Rural                     | 26953 (69.62)      | 7858 (20.29) | 2592 (6.70)                                                       | 304 (0.79)                                    | 604 (1.56)          | 404 (1.04)                        |
| Urban                     | 11389 (56.21)      | 6057 (29.90) | 1285 (6.34)                                                       | 155 (0.77)                                    | 923 (4.56)          | 451 (1.59)                        |
| <b>Religion</b>           |                    |              |                                                                   |                                               |                     |                                   |
| Hindu                     | 28644 (66.25)      | 9890 (22.87) | 2870 (6.63)                                                       | 363 (0.84)                                    | 880 (2.04)          | 591 (1.37)                        |
| Muslim                    | 3976 (57.07)       | 1907 (27.37) | 546 (7.84)                                                        | 59 (0.85)                                     | 327 (4.69)          | 153 (2.20)                        |
| Christian                 | 4145 (69.27)       | 1316 (21.99) | 269 (4.49)                                                        | 25 (0.42)                                     | 162 (2.71)          | 67 (1.12)                         |
| Others                    | 1577 (56.62)       | 802 (28.80)  | 192 (6.89)                                                        | 12 (0.43)                                     | 158 (5.67)          | 44 (1.58)                         |
| <b>Social group</b>       |                    |              |                                                                   |                                               |                     |                                   |
| Scheduled Castes          | 6744 (67.72)       | 2175 (21.84) | 711 (7.13)                                                        | 78 (0.78)                                     | 145 (1.46)          | 106 (1.06)                        |
| Scheduled Tribes          | 7832 (75.68)       | 1821 (17.60) | 418 (4.03)                                                        | 46 (0.44)                                     | 163 (1.58)          | 68 (0.65)                         |
| Other Backward Classes    | 14392 (64.70)      | 5329 (23.96) | 1477 (6.64)                                                       | 204 (0.92)                                    | 540 (2.43)          | 301 (1.35)                        |
| Others                    | 9374 (57.07)       | 4590 (27.95) | 1271 (7.74)                                                       | 131 (0.80)                                    | 679 (4.13)          | 380 (2.31)                        |
| <b>Level of Education</b> |                    |              |                                                                   |                                               |                     |                                   |
| No education              | 19080 (68.72)      | 6057 (21.81) | 1825 (6.57)                                                       | 222 (0.80)                                    | 309 (1.11)          | 273 (0.98)                        |
| Less than 5 years         | 6882 (62.80)       | 2645 (24.14) | 815 (7.44)                                                        | 108 (0.99)                                    | 317 (2.89)          | 192 (1.75)                        |
| 5-9 years                 | 5956 (63.49)       | 2254 (24.03) | 616 (6.57)                                                        | 72 (0.77)                                     | 311 (3.32)          | 171 (1.82)                        |
| 10 years or more          | 6424 (59.09)       | 2959 (27.22) | 621 (5.71)                                                        | 57 (0.52)                                     | 590 (5.43)          | 219 (2.01)                        |
| <b>Wealth Tertile</b>     |                    |              |                                                                   |                                               |                     |                                   |
| Poor                      | 16734 (71.09)      | 4746 (20.16) | 1328 (5.64)                                                       | 170 (0.72)                                    | 357 (1.52)          | 202 (0.85)                        |
| Non-poor                  | 21608 (60.97)      | 9169 (25.87) | 2549 (7.19)                                                       | 289 (0.82)                                    | 1170 (3.30)         | 653 (1.84)                        |

|                                          |                      |                      |                    |                   |                    |                   |
|------------------------------------------|----------------------|----------------------|--------------------|-------------------|--------------------|-------------------|
| <b>Current Marital Status</b>            |                      |                      |                    |                   |                    |                   |
| In union                                 | 29735 (66.93)        | 9736 (21.91)         | 2855 (6.43)        | 321 (0.72)        | 1175 (2.64)        | 605 (1.36)        |
| Not in union                             | 8607 (59.16)         | 4179 (28.73)         | 1022 (7.03)        | 138 (0.95)        | 352 (2.42)         | 250 (1.72)        |
| <b>Current Working Status</b>            |                      |                      |                    |                   |                    |                   |
| Never worked                             | 9141 (56.72)         | 4674 (29.00)         | 1233 (7.65)        | 123 (0.76)        | 625 (3.88)         | 319 (1.98)        |
| Worked in past but not currently working | 8727 (56.27)         | 4551 (29.34)         | 1185 (7.64)        | 188 (1.21)        | 482 (3.11)         | 377 (2.43)        |
| Currently Working                        | 20474 (74.86)        | 4690 (17.15)         | 1459 (5.33)        | 148 (0.54)        | 420 (1.54)         | 159 (0.58)        |
| <b>Tobacco Consumption</b>               |                      |                      |                    |                   |                    |                   |
| Never used Tobacco                       | 174 (1.23)           | 9698 (68.61)         | 2255 (15.95)       | 242 (1.71)        | 1190 (8.42)        | 575 (4.07)        |
| Consumed in past but not currently       | 1886 (57.54)         | 817 (24.92)          | 280 (8.54)         | 63 (1.92)         | 129 (3.94)         | 103 (3.14)        |
| Currently Consuming                      | 13282 (71.56)        | 3400 (18.32)         | 1342 (7.23)        | 154 (0.83)        | 208 (1.12)         | 177 (0.95)        |
| <b>Ever consumed alcohol</b>             |                      |                      |                    |                   |                    |                   |
| No                                       | 30750 (63.59)        | 11970                | 3240 (6.70)        | 361 (0.75)        | 1296 (2.68)        | 737 (1.52)        |
| Yes                                      | 7592 (71.48)         | 1945                 | 637 (5.99)         | 98 (0.92)         | 231 (2.17)         | 118 (1.11)        |
| <b>Physical Activity</b>                 |                      |                      |                    |                   |                    |                   |
| Physically Active                        | 27730 (67.15)        | 9071                 | 2722 (6.59)        | 285 (0.69)        | 1017 (2.46)        | 470 (1.13)        |
| Physically Inactive                      | 10612 (60.02)        | 4844                 | 1155 (6.53)        | 174 (0.98)        | 510 (2.88)         | 385 (2.18)        |
| <b>Body Mass Index</b>                   |                      |                      |                    |                   |                    |                   |
| Underweight                              | 8425 (77.85)         | 1533                 | 634 (5.85)         | 122 (1.13)        | 46 (0.42)          | 62 (0.57)         |
| Normal                                   | 20985 (68.74)        | 6576                 | 1909 (6.25)        | 215 (0.70)        | 526 (1.72)         | 318 (1.04)        |
| Overweight                               | 6775 (53.55)         | 3977                 | 925 (7.31)         | 78 (0.62)         | 610 (4.82)         | 286 (2.26)        |
| Obese                                    | 1799 (41.86)         | 1620                 | 362 (8.42)         | 40 (0.93)         | 325 (7.56)         | 152 (3.54)        |
| Don't Know                               | 358 (53.04)          | 209                  | 47 (6.96)          | 4 (0.59)          | 20 (2.96)          | 37 (5.48)         |
| <b>Waist-Hip Ratio</b>                   |                      |                      |                    |                   |                    |                   |
| Low Risk                                 | 8959 (76.16)         | 1891                 | 661 (5.62)         | 99 (0.84)         | 72 (0.61)          | 81 (0.69)         |
| High Risk                                | 29383 (62.24)        | 12024                | 3216 (6.81)        | 360 (0.76)        | 1455 (3.08)        | 774 (1.63)        |
| <b>Total</b>                             | <b>38342 (65.01)</b> | <b>13915 (23.59)</b> | <b>3877 (6.57)</b> | <b>459 (0.78)</b> | <b>1527 (2.58)</b> | <b>855 (1.45)</b> |
